# Supplementary material for: Terrestrial cosmogenic nuclide bedrock depth profiles used to infer changes in Holocene glacier cover, Vintage Peak, southern Coast Mountains, British Columbia
Source: Copernicus journal article supplement (doi:10.5194/gchron-7-157-2025), 2025-04-28
Supplement: Supplementary file 1 [file gchron-7-157-2025-supplement.zip]

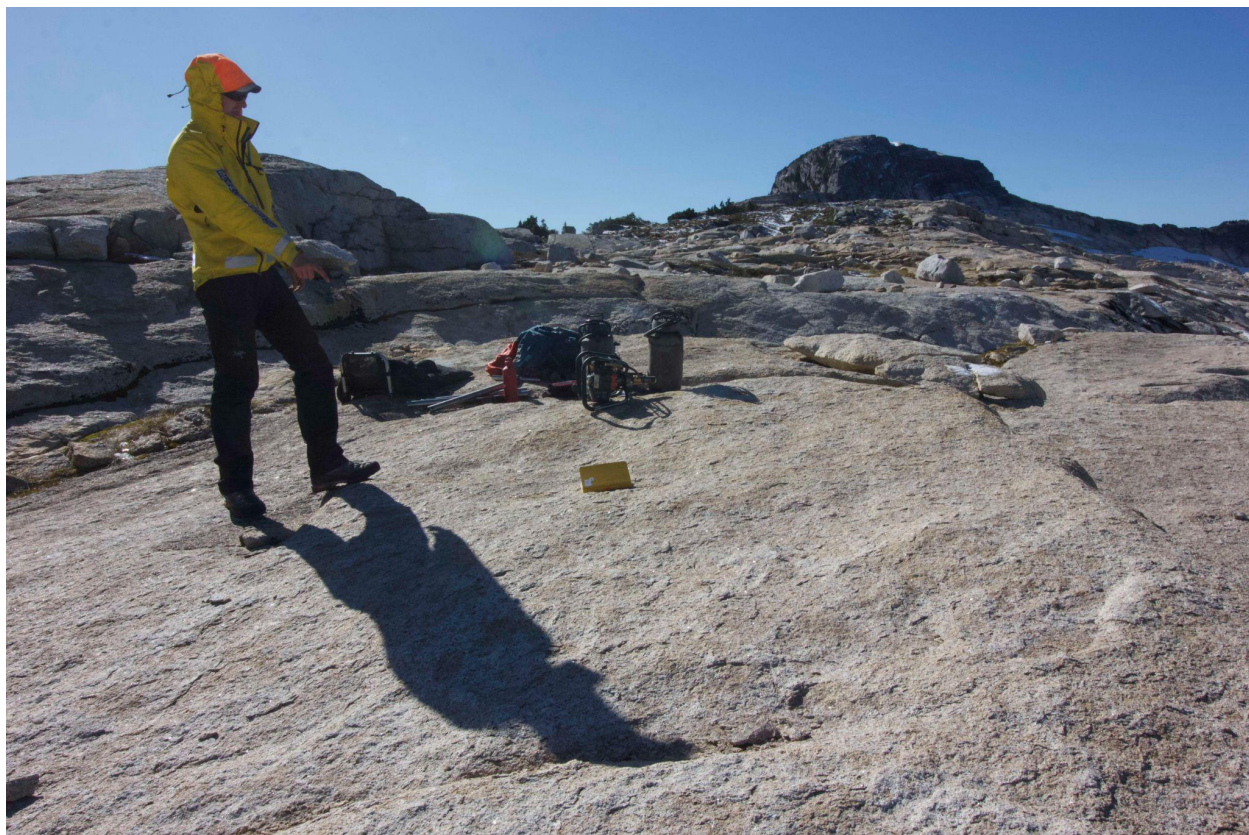

**Figure S1:** VPC1 Core site, looking South. Summit of Lockie's table in the background.

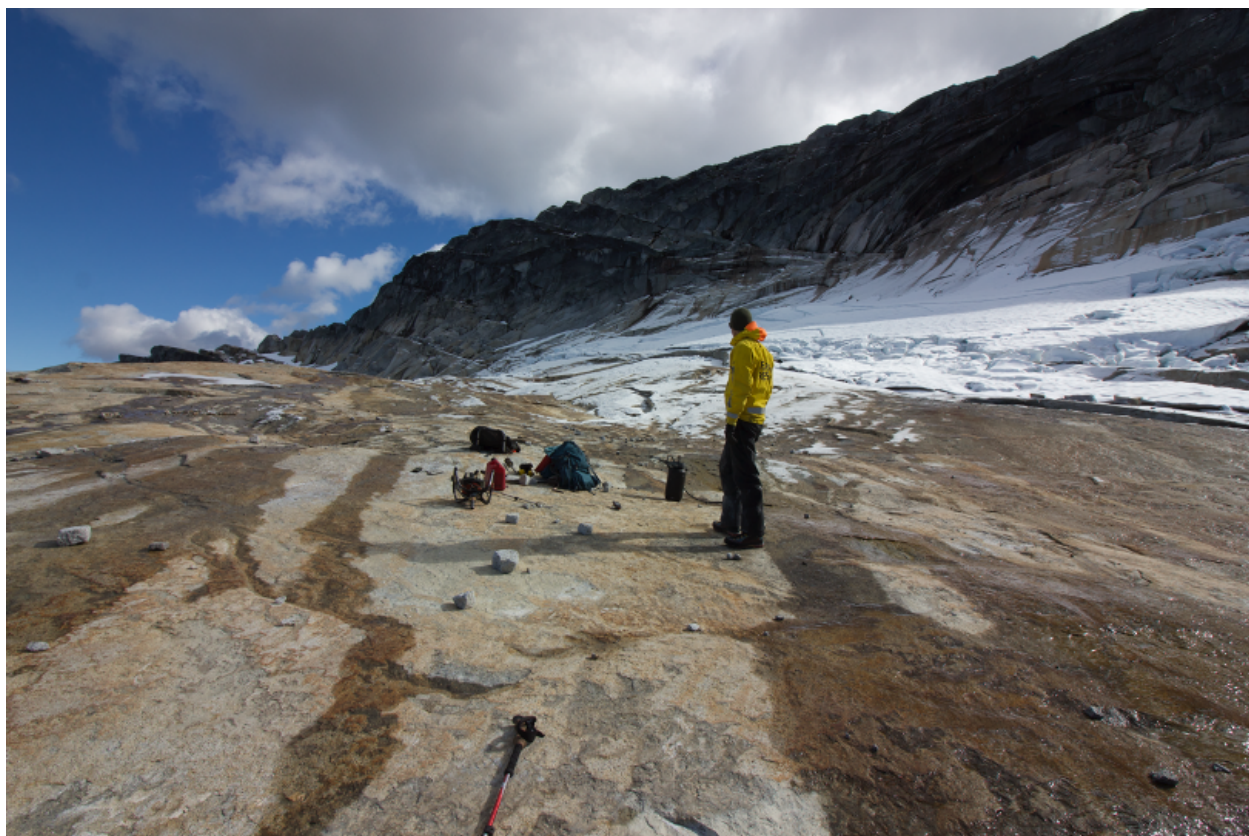



**Figure S2:** Sampling location at 17-VPC2 with remnant ice of informally named Lockie's Glacier in the background.

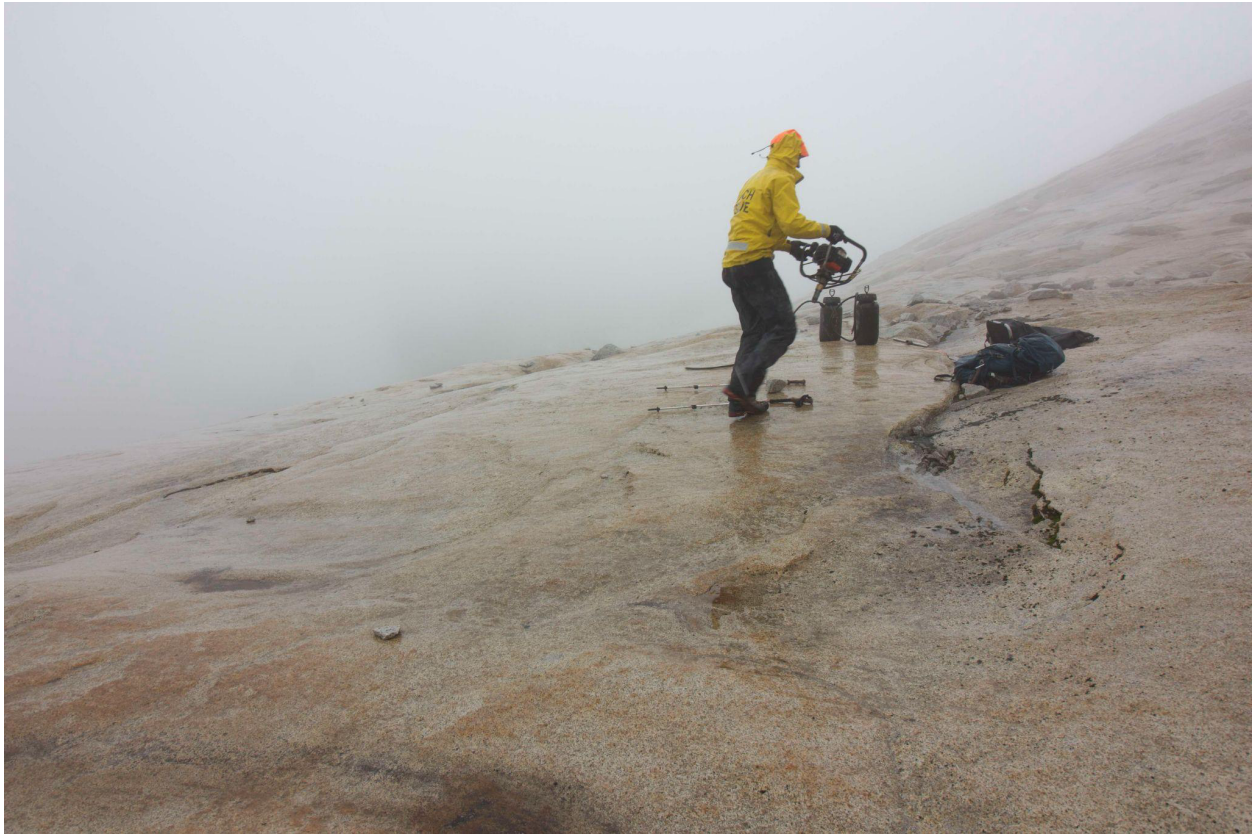

**Figure S3:** VPC3 Core site. Core collected on bedrock surface next to cobble under author's knee in photo, between trekking poles indicating paleoflow direction (right to left in photo) of Lockie's Glacier.



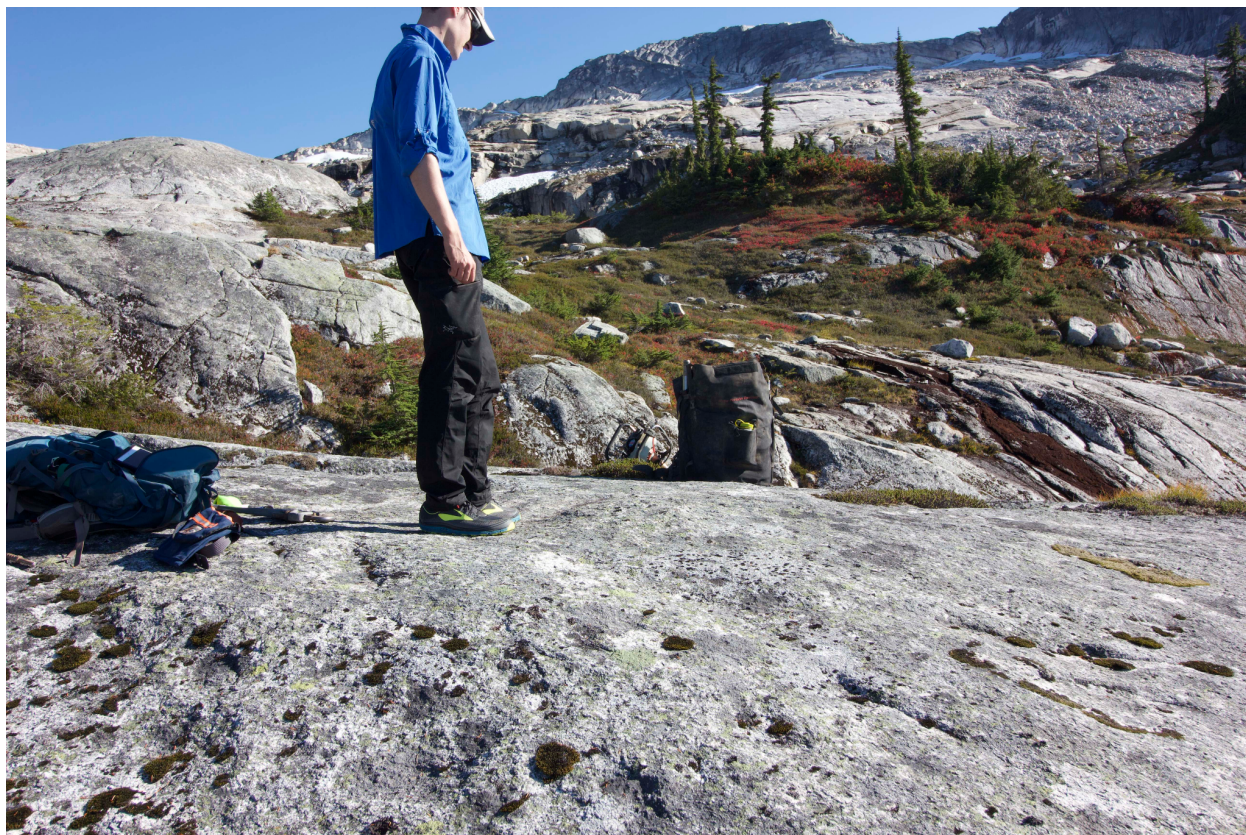

**Figure S4:** Sampling location of 17-VPC4. Note the cirque headwall of Lockie's Table at the top of the image and a portion of the left lateral moraine in the top right corner of the image.

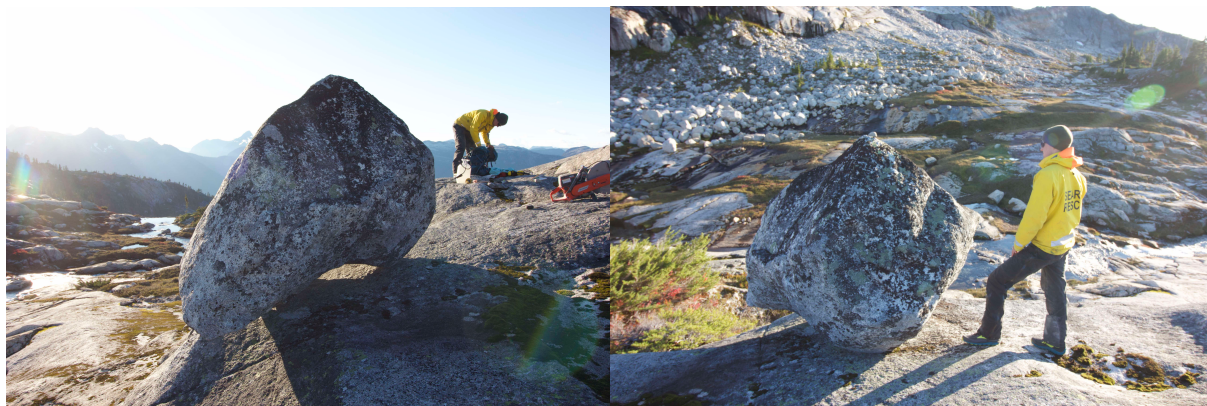

**Figure S5:** 17-VP-07 erratic boulder.



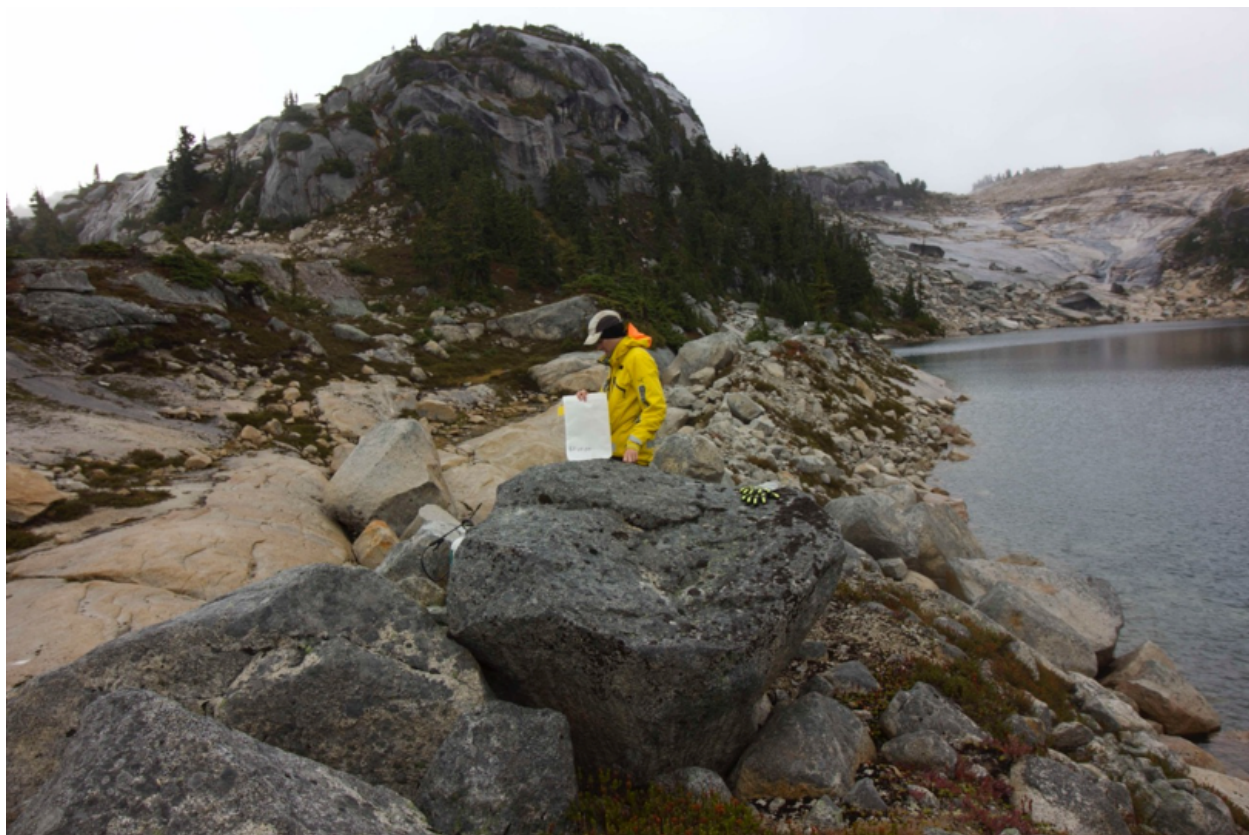

**Figure S6:** Example boulder (17-VP-04) on the late Holocene moraine deposited by Lockie's Glacier. Note the boulder sits atop a blocky, bouldery moraine draped over bedrock.



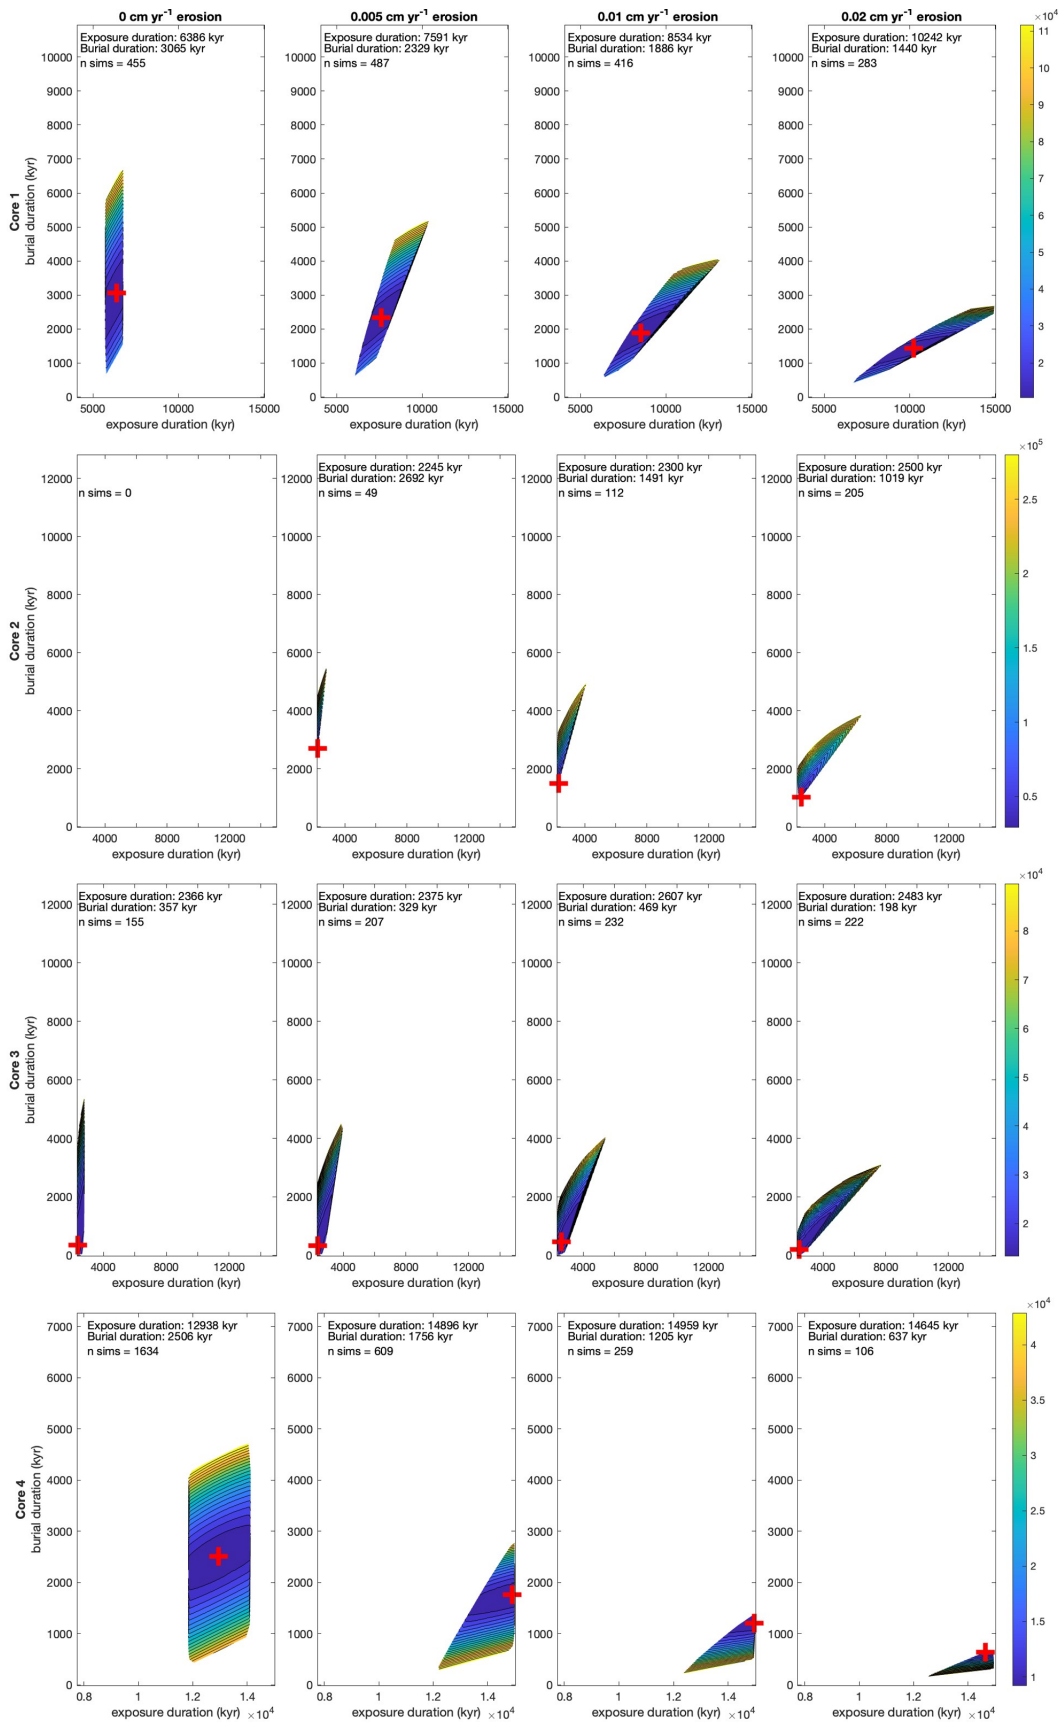



**Figure S7:** Monte Carlo modelling results assuming 3 kyr of inherited  $^{10}\text{Be}$ . See main text for additional modelling details.
