# Supplementary material for: Terrestrial cosmogenic nuclide bedrock depth profiles used to infer changes in Holocene glacier cover, Vintage Peak, southern Coast Mountains, British Columbia
Source: Copernicus journal article supplement (doi:10.5194/gchron-7-157-2025), 2025-04-28
Supplement: Supplementary file 2 [file gchron-7-157-2025-supplement.zip]

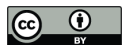

## *Supplement of*

# **Terrestrial cosmogenic nuclide bedrock depth profiles used to infer changes in Holocene glacier cover, Vintage Peak, southern Coast Mountains, British Columbia**

**Adam C. Hawkins et al.**

*Correspondence to:* Adam C. Hawkins ([adam.hawkins@unbc.ca](mailto:adam.hawkins@unbc.ca))

- [gchron-7-157-2025-supplement-title-page.pdf](#)

- Supplement

- Data S1

- \* .DS\_Store
    - \* 17-VP-01
    - \* 17-VP-02
    - \* 17-VP-03
    - \* 17-VP-04
    - \* 17-VP-05
    - \* 17-VP-06
    - \* 17-VP-07
    - \* 17-VP-09
    - \* 17-VP-10
    - \* 17-VP-11

- Supplement.pdf

- Table S1.xlsx

- Table S2.xlsx

- Table S3.xlsx

The copyright of individual parts of the supplement might differ from the article licence.
