# Supplementary material for: Terrestrial cosmogenic nuclide bedrock depth profiles used to infer changes in Holocene glacier cover, Vintage Peak, southern Coast Mountains, British Columbia
Source: Copernicus journal article supplement (doi:10.5194/gchron-7-157-2025), 2025-04-28
Supplement: Supplementary file 2 [file Table S1.xlsx]

## Sheet: Sheet1
Vintage Peak sample blank information
Sample	Mass carrier (g)	10Be-9Be ratio	1-sigma uncertainty	Samples applied to:
BAB_020518	0.2603	1.01e-15	2.61e-16	17-VP1-5; 17-VPC(1-4)-0005
BAB_021018	0.2888	1.71e-15	3.42e-16	17-VP6,7,9-11
Blank carrier for BAB_020518 contained a Be concentration of 1014 +/- 8 ppm
Blank carrier for BAB_021018 contained a Be concentration of 1074 +/- 8 ppm
