# Supplementary material for: Terrestrial cosmogenic nuclide bedrock depth profiles used to infer changes in Holocene glacier cover, Vintage Peak, southern Coast Mountains, British Columbia
Source: Copernicus journal article supplement (doi:10.5194/gchron-7-157-2025), 2025-04-28
Supplement: Supplementary file 4 [file Table S3.xlsx]

## Sheet: Sheet1
Sample ID	Quartz mass (g)	C yield (μg)	±1σ (μg)	14C/13C corrected	±1σ	δ13C (‰)	±1σ (‰)	14C/C total	±1σ	Total 14C (atoms)	±1σ (atoms)	14C concentration
17-VPC4-0005	2.4974	4.7	0.1	8.55e-12	5.49e-14	-4.71	0.5	9.37e-14	6.03e-16	531000	7610	188600	158600-203100	115000-209800
17-VPC4-1015	5.0144	6	0.1	1.56e-11	7.73e-14	-6.22	0.5	1.71e-13	8.5e-16	960000	13200	179400	164300-187000	142500-191200
17-VPC4-2025	5.097	5.9	0.1	1.33e-11	7.45e-14	-5.94	0.5	1.45e-13	8.19e-16	830000	11600	151100	136400-158200	115000-162500
17-VPC4-3035	5.1759	7.3	0.1	1.27e-11	6.81e-14	-6.91	0.5	1.39e-13	7.48e-16	757000	10500	134700	120100-141800	99200-145600
17-VPC4-4045	4.9596	6.7	0.1	1.29e-11	6.52e-14	-6.02	0.5	1.41e-13	7.17e-16	786000	10800	146400	131200-153700	109500-157700
17-VPC3-0005	2.8644	5.9	0.1	4.92e-12	4.21e-14	-6.01	0.5	5.39e-14	4.62e-16	291000	4480	81000	55100-93200	18300-98500
17-VPC3-0510	4.9638	6.7	0.1	7.01e-12	5e-14	-6.17	0.5	7.67e-14	5.49e-16	427000	6260	74100	59000-81200	37000-84400
17-VPC3-1015	4.9502	7	0.1	6.77e-12	4.97e-14	-5.86	0.5	7.42e-14	5.45e-16	410000	6050	70900	55700-78000	33500-81300
17-VPC3-2025	4.9727	6.6	0.1	6.03e-12	4.68e-14	-5.94	0.5	6.61e-14	5.13e-16	357000	5340	59900	44700-66900	22900-70200
17-VPC3-3035	5.0228	6.5	0.1	8.08e-12	5.53e-14	-10.17	0.5	8.81e-14	6.05e-16	488000	7090	85300	70400-92300	48800-95800
17-VPC2-0005	3.132	6.6	0.1	5.31e-12	4.49e-14	-5.94	0.5	5.81e-14	4.93e-16	322000	4950	84000	59900-95100	25400-100200
17-VPC2-0510	5.0318	6.8	0.1	7.5e-12	5.64e-14	-5.9	0.5	8.22e-14	6.19e-16	457000	6780	79000	64100-86100	42600-89400
17-VPC2-1015	5.0306	8.2	0.1	7.7e-12	5.06e-14	-5.99	0.5	8.43e-14	5.55e-16	463000	6670	80200	65400-87300	43500-90500
17-VPC2-1520	5.0345	9.5	0.1	7.6e-12	4.95e-14	-6.8	0.5	8.32e-14	5.43e-16	452000	6490	78000	63000-85000	41300-88200
17-VPC2-2530	5.0279	8.7	0.1	6.07e-12	5.03e-14	-6.33	0.5	6.65e-14	5.51e-16	380000	5800	63700	48800-70800	27100-73900
17-VPC1-0005	3.0796	7.7	0.1	8.17e-12	5.33e-14	-6.07	0.5	8.95e-14	5.85e-16	491000	7060	140100	115800-151700	80100-157100
17-VPC1-0510	5.059	7.8	0.1	1.22e-11	7.08e-14	-6.23	0.5	1.33e-13	7.78e-16	721000	10100	130700	116000-137800	94200-141700
17-VPC1-1520	5.0316	6.5	0.1	1.02e-11	5.87e-14	-5.72	0.5	1.12e-13	6.45e-16	616000	8640	110600	95700-117700	73600-121300
17-VPC1-2530	5.02	10.2	0.1	1.1e-11	6.59e-14	-6.76	0.5	1.21e-13	7.23e-16	667000	9430	120900	106000-128200	84300-132000
17-VPC1-3540	2.9968	7.8	0.1	7.17e-12	5.05e-14	-6.33	0.5	7.85e-14	5.54e-16	428000	6260	122900	98100-134800	62000-140300
17-VP-07	5.0698	7.9	0.1	2.1e-11	1.1e-13	-4.85	0.5	2.3e-13	1.21e-15	1250000	17400	234500	219600-242200	198100-247300
